# Supplementary material
Source: PubMed Central journal article supplement (PMC4787681)
Supplement: wacs676882.w7_default.pdf [file wacs676882.w7_default.pdf]

**Appendix 7: Members of safety monitoring committees [posted as supplied by author]**

Members of the *Data Safety Monitoring Board* of CVT: A Benevides (Instituto Costarricense de Investigación y Enseñanza en Nutrición y Salud, Cartago, Costa Rica), L Calzada (University of Costa Rica, San José, Costa Rica), R Karron (Johns Hopkins University Bloomberg School of Public Health, Baltimore, Maryland), R Nayar (Northwestern University, Chicago, Illinois), N Roach (Marti Nelson Cancer Foundation, Hood River, Oregon), S Self (Fred Hutchinson Cancer Research Center, Seattle, Washington), B Wojcik (National Cancer Institute, Rockville, Maryland).

Members of the *Independent Data Monitoring Committee* of PATRICIA: C Bergeron (Laboratory Pasteur-Cerba, Cergy Pontoise, France), E Eisenstein (Clinica de Adolescentes, Rio de Janeiro, Brazil), R Karron (Johns Hopkins University Bloomberg School of Public Health, Baltimore, Maryland), R Marks (Gainesville, FL USA), T Nolan (University of Melbourne, Victoria, Australia), S K Tay (Singapore General Hospital, Singapore).
