# Supplementary material
Source: PubMed Central journal article supplement (PMC4787681)
Supplement: wacs676882.ww5_default.pdf [file wacs676882.ww5_default.pdf]

## **Appendix 5: Analysis of Rates of Total Pregnancies and of Live births [posted as supplied by author]**

For analyses of total pregnancies and live births, we calculated total days at risk for pregnancy as the rate denominator, where a day at risk of pregnancy was one where the woman was not pregnant, did not have a birth or miscarriage in the previous 30 days, and was either under follow-up or had subsequent contact with the study team (Supplemental Figures 1a and 1b). Results were similar for other time scales.

Supplemental Figure 1a. Rate of live births in HPV and HVA arm and delta by time of estimated conception after first vaccination

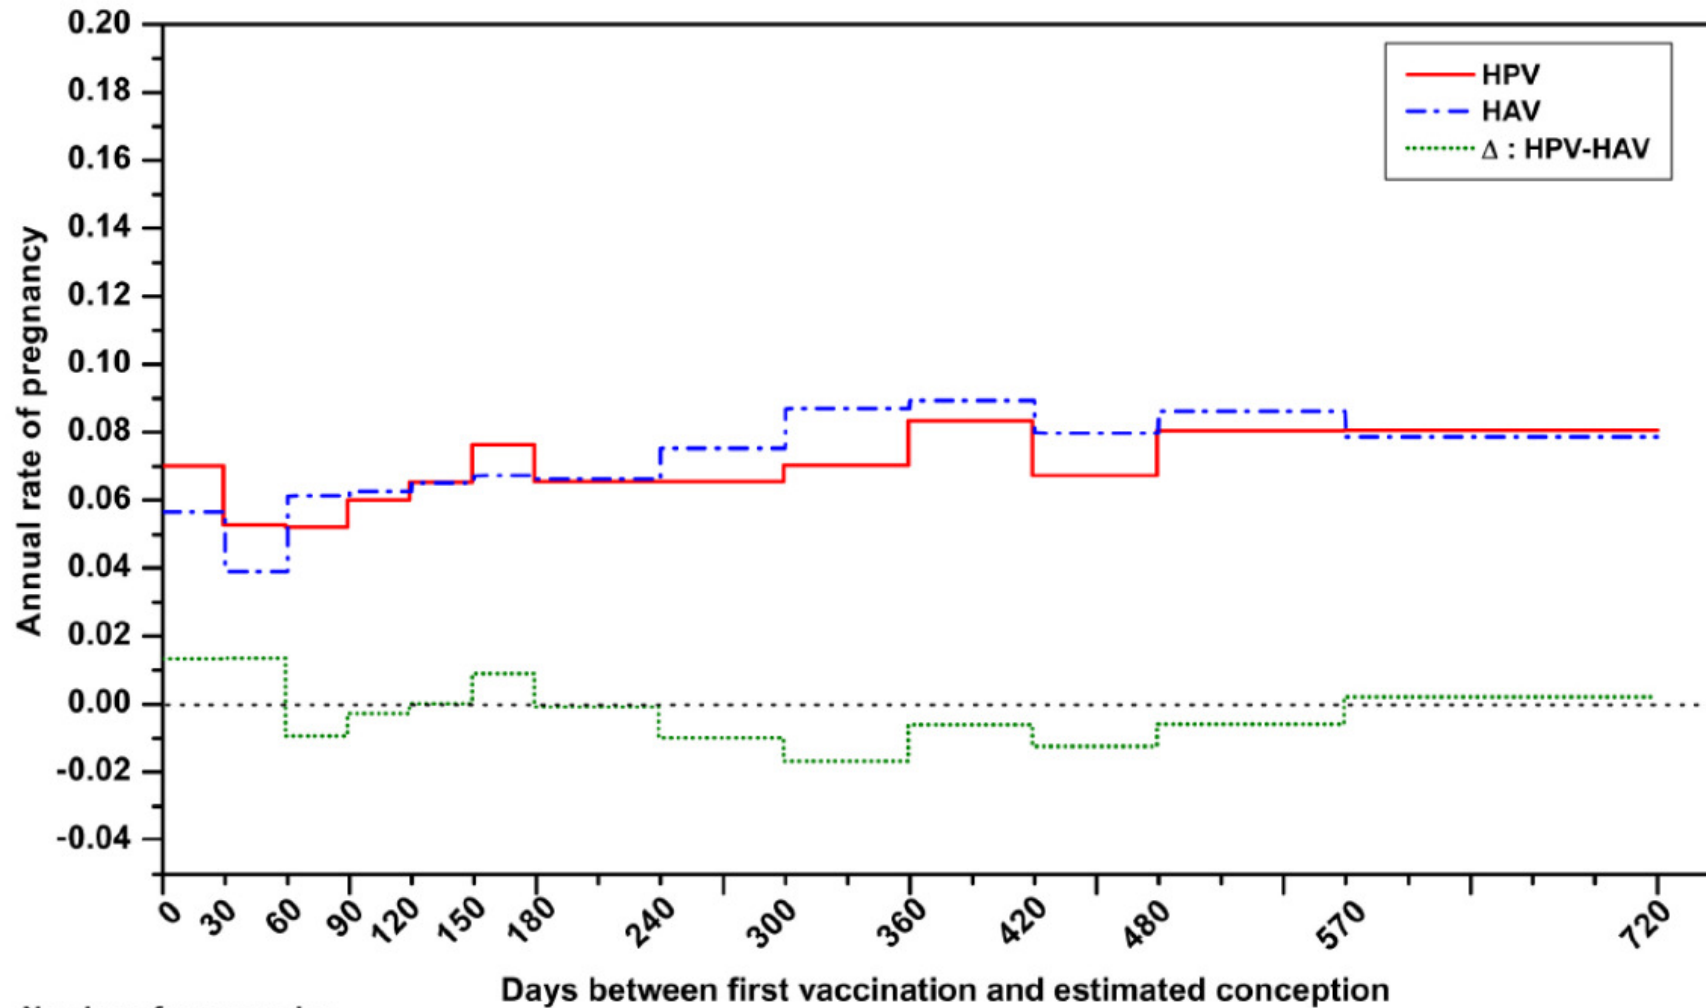

**Number of pregnancies**

|     |    |    |    |    |    |    |     |     |     |     |     |     |     |
|-----|----|----|----|----|----|----|-----|-----|-----|-----|-----|-----|-----|
| HPV | 74 | 55 | 54 | 62 | 67 | 78 | 132 | 130 | 138 | 161 | 125 | 213 | 281 |
| HAV | 60 | 41 | 64 | 65 | 67 | 69 | 134 | 150 | 171 | 172 | 147 | 227 | 273 |

**Person years at risk for pregnancy (in hundreds)**

|     |    |    |    |    |    |    |    |    |    |    |    |    |    |
|-----|----|----|----|----|----|----|----|----|----|----|----|----|----|
| HPV | 11 | 10 | 10 | 10 | 10 | 10 | 20 | 20 | 20 | 19 | 19 | 26 | 35 |
| HAV | 11 | 10 | 10 | 10 | 10 | 10 | 20 | 20 | 20 | 19 | 18 | 26 | 35 |

Supplemental Figure 1b. Rate of total pregnancy in HPV and HAV arm and delta by time of estimated conception after first vaccination

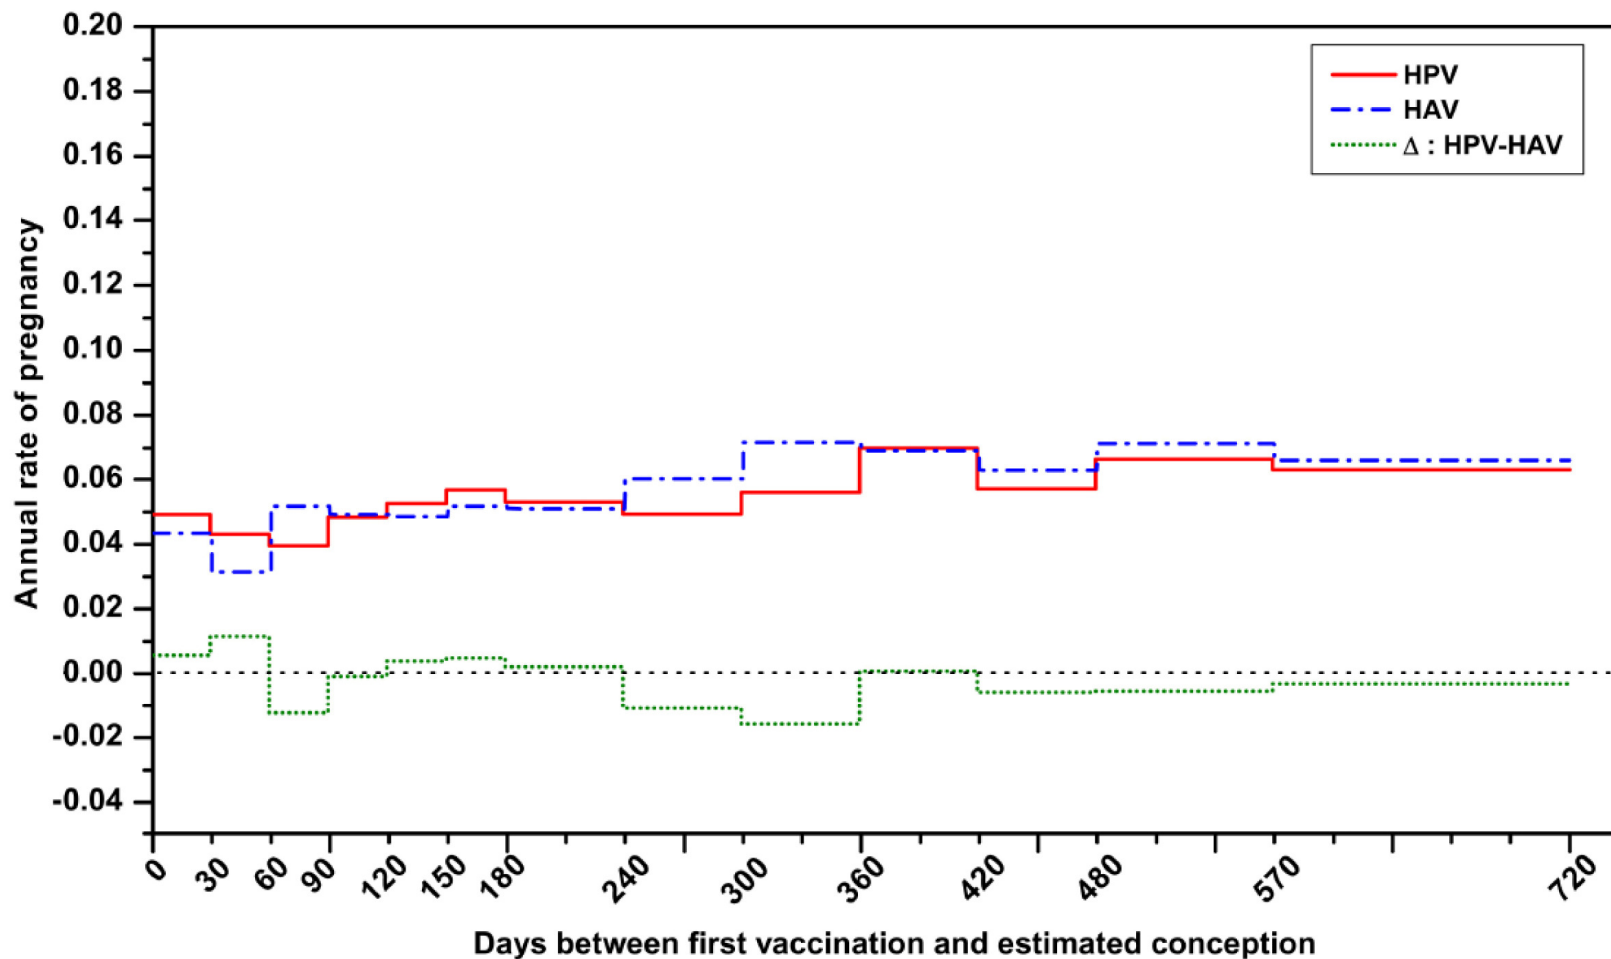

**Number of live births**

|     |    |    |    |    |    |    |     |     |     |     |     |     |     |
|-----|----|----|----|----|----|----|-----|-----|-----|-----|-----|-----|-----|
| HPV | 52 | 45 | 41 | 50 | 54 | 58 | 107 | 98  | 110 | 135 | 106 | 175 | 219 |
| HAV | 46 | 33 | 54 | 51 | 50 | 53 | 103 | 120 | 141 | 133 | 116 | 188 | 229 |

**Person years at risk for pregnancy (in hundreds)**

|     |    |    |    |    |    |    |    |    |    |    |    |    |    |
|-----|----|----|----|----|----|----|----|----|----|----|----|----|----|
| HPV | 11 | 10 | 10 | 10 | 10 | 10 | 20 | 20 | 20 | 19 | 19 | 26 | 35 |
| HAV | 11 | 10 | 10 | 10 | 10 | 10 | 20 | 20 | 20 | 19 | 18 | 26 | 35 |
