# Supplementary material
Source: PubMed Central journal article supplement (PMC4787681)
Supplement: wacs676882.ww6_default.pdf [file wacs676882.ww6_default.pdf]

Appendix 6: Supplemental tables 1a-e (minimum detectable relative risks) [posted as supplied by author]

Table 1a. Minimum detectable relative risk at a given power for permutation test and standard tests that specify interval at increased risk, one-sided a-level of 0.025, Power = 0.99

| Range of days between nearest vaccination and conception for subset of pregnancy at increased risk |     | Pregnancies                 |                     | Minimum detectable relative risk from permutation test | Minimum detectable relative risk (MDRR) from standard test among pregnancies in specified window of days between nearest vaccination and estimated conception date and Percent difference in minimum detectable RR of standard test compared to permutation test |              |         |              |          |              |          |              |         |              |         |              |         |              |         |              |         |              |
|----------------------------------------------------------------------------------------------------|-----|-----------------------------|---------------------|--------------------------------------------------------|------------------------------------------------------------------------------------------------------------------------------------------------------------------------------------------------------------------------------------------------------------------|--------------|---------|--------------|----------|--------------|----------|--------------|---------|--------------|---------|--------------|---------|--------------|---------|--------------|---------|--------------|
| Start                                                                                              | End | Vaccine against Hepatitis A | Vaccine against HPV |                                                        | -∞ to ∞                                                                                                                                                                                                                                                          |              | 90 to ∞ |              | 120 to ∞ |              | 180 to ∞ |              | 0 to 14 |              | 0 to 29 |              | 0 to 44 |              | 0 to 59 |              | 0 to 89 |              |
|                                                                                                    |     |                             |                     |                                                        | MDRR                                                                                                                                                                                                                                                             | % difference | MDRR    | % difference | MDRR     | % difference | MDRR     | % difference | MDRR    | % difference | MDRR    | % difference | MDRR    | % difference | MDRR    | % difference | MDRR    | % difference |
| 0                                                                                                  | 14  | 75                          | 98                  | 3.96                                                   | 10.5                                                                                                                                                                                                                                                             | <-100%       | ∞       | -∞           | ∞        | -∞           | ∞        | -∞           | 3.74    | 6%           | 4.46    | -13%         | 5.14    | -30%         | 5.44    | -37%         | 5.84    | -47%         |
| 0                                                                                                  | 29  | 140                         | 162                 | 3.12                                                   | 6.75                                                                                                                                                                                                                                                             | <-100%       | ∞       | -∞           | ∞        | -∞           | ∞        | -∞           | 4.04    | -29%         | 2.76    | 12%          | 3.06    | 2%           | 3.22    | -3%          | 3.46    | -11%         |
| 0                                                                                                  | 44  | 188                         | 228                 | 2.78                                                   | 5.25                                                                                                                                                                                                                                                             | -89%         | ∞       | -∞           | ∞        | -∞           | ∞        | -∞           | 4.38    | -58%         | 2.8     | -1%          | 2.46    | 12%          | 2.58    | 7%           | 2.74    | 1%           |
| 0                                                                                                  | 59  | 253                         | 291                 | 2.54                                                   | 3.7                                                                                                                                                                                                                                                              | -46%         | ∞       | -∞           | ∞        | -∞           | ∞        | -∞           | 4.76    | -87%         | 2.86    | -13%         | 2.5     | 2%           | 2.24    | 12%          | 2.36    | 7%           |
| 0                                                                                                  | 89  | 396                         | 409                 | 2.22                                                   | 2.92                                                                                                                                                                                                                                                             | -32%         | ∞       | -∞           | ∞        | -∞           | ∞        | -∞           | 5.4     | <-100%       | 2.96    | -33%         | 2.56    | -15%         | 2.28    | -3%          | 1.98    | 11%          |
| 0                                                                                                  | 119 | 524                         | 525                 | 2.08                                                   | 2.5                                                                                                                                                                                                                                                              | -20%         | 12      | <-100%       | ∞        | -∞           | ∞        | -∞           | 6.16    | <-100%       | 3.06    | -47%         | 2.62    | -26%         | 2.32    | -12%         | 2       | 4%           |
| 0                                                                                                  | 359 | 1228                        | 1145                | 1.68                                                   | 1.7                                                                                                                                                                                                                                                              | -1%          | 1.96    | -17%         | 2.12     | -26%         | 2.6      | -55%         | 150     | <-100%       | 5.2     | <-100%       | 3.04    | -81%         | 2.58    | -54%         | 2.12    | -26%         |
| 15                                                                                                 | 29  | 65                          | 64                  | >4                                                     | 89.5                                                                                                                                                                                                                                                             | §            | ∞       | ∅            | ∞        | ∅            | ∞        | ∅            | ∞       | ∅            | 6.46    | §            | 7.34    | §            | 7.78    | §            | 8.4     | §            |
| 30                                                                                                 | 44  | 48                          | 66                  | >4                                                     | 76.75                                                                                                                                                                                                                                                            | §            | ∞       | ∅            | ∞        | ∅            | ∞        | ∅            | ∞       | ∅            | ∞       | ∅            | 7.16    | §            | 7.58    | §            | 8.18    | §            |
| 30                                                                                                 | 59  | 113                         | 129                 | 3.46                                                   | 8.25                                                                                                                                                                                                                                                             | <-100%       | ∞       | -∞           | ∞        | -∞           | ∞        | -∞           | ∞       | -∞           | ∞       | -∞           | 7.74    | <-100%       | 4.14    | -20%         | 4.68    | -35%         |
| 30                                                                                                 | 89  | 256                         | 247                 | 2.64                                                   | 4.75                                                                                                                                                                                                                                                             | -80%         | ∞       | -∞           | ∞        | -∞           | ∞        | -∞           | ∞       | -∞           | ∞       | -∞           | 9.14    | <-100%       | 4.64    | -76%         | 2.62    | 1%           |
| 60                                                                                                 | 74  | 76                          | 61                  | >4                                                     | 113                                                                                                                                                                                                                                                              | §            | ∞       | ∅            | ∞        | ∅            | ∞        | ∅            | ∞       | ∅            | ∞       | ∅            | ∞       | ∅            | ∞       | ∅            | 8.78    | §            |
| 60                                                                                                 | 89  | 143                         | 118                 | 3.5                                                    | 9                                                                                                                                                                                                                                                                | <-100%       | ∞       | -∞           | ∞        | -∞           | ∞        | -∞           | ∞       | -∞           | ∞       | -∞           | ∞       | -∞           | ∞       | -∞           | 5.02    | -43%         |
| 90                                                                                                 | ∞   | 1331                        | 1274                | 1.66                                                   | 1.62                                                                                                                                                                                                                                                             | 2%           | 1.52    | 8%           | 1.56     | 6%           | 1.62     | 2%           | ∞       | -∞           | ∞       | -∞           | ∞       | -∞           | ∞       | -∞           | ∞       | -∞           |
| 120                                                                                                | ∞   | 1203                        | 1158                | 1.72                                                   | 1.68                                                                                                                                                                                                                                                             | 2%           | 1.58    | 8%           | 1.56     | 9%           | 1.62     | 6%           | ∞       | -∞           | ∞       | -∞           | ∞       | -∞           | ∞       | -∞           | ∞       | -∞           |
| 180                                                                                                | ∞   | 993                         | 968                 | 1.76                                                   | 1.82                                                                                                                                                                                                                                                             | -3%          | 1.68    | 5%           | 1.66     | 6%           | 1.6      | 9%           | ∞       | -∞           | ∞       | -∞           | ∞       | -∞           | ∞       | -∞           | ∞       | -∞           |
| -∞                                                                                                 | ∞   | 1814                        | 1786                | 1.58                                                   | 1.44                                                                                                                                                                                                                                                             | 9%           | 1.54    | 3%           | 1.58     | 0%           | 1.66     | -5%          | 150     | <-100%       | 150     | <-100%       | 5.4     | <-100%       | 2.94    | -86%         | 2.3     | -46%         |
| 0                                                                                                  | 14  | 75                          | 98                  | 6.32                                                   | 6.32                                                                                                                                                                                                                                                             | -60%         | 8.42    | <-100%       | ∞        | -∞           | ∞        | -∞           | ∞       | -∞           | ∞       | -∞           | ∞       | -∞           | ∞       | -∞           | ∞       | -∞           |
| 0                                                                                                  | 29  | 140                         | 162                 | 3.9                                                    | 3.9                                                                                                                                                                                                                                                              | -25%         | 5.48    | -76%         | 5.02     | -61%         | ∞        | -∞           | ∞       | -∞           | ∞       | -∞           | ∞       | -∞           | ∞       | -∞           | ∞       | -∞           |
| 0                                                                                                  | 44  | 188                         | 228                 | 2.92                                                   | 2.92                                                                                                                                                                                                                                                             | -5%          | 3.7     | -33%         | 5.34     | -92%         | 6.36     | <-100%       | 7       | <-100%       | 7.96    | <-100%       | ∞       | -∞           | ∞       | -∞           | ∞       | -∞           |
| 0                                                                                                  | 59  | 253                         | 291                 | 2.52                                                   | 2.52                                                                                                                                                                                                                                                             | 1%           | 3.12    | -23%         | 5.68     | <-100%       | 6.98     | <-100%       | 3.18    | -25%         | 3.82    | -50%         | ∞       | -∞           | ∞       | -∞           | ∞       | -∞           |
| 0                                                                                                  | 89  | 396                         | 409                 | 2.08                                                   | 2.08                                                                                                                                                                                                                                                             | 6%           | 2.52    | -14%         | 6.56     | <-100%       | 8.78     | <-100%       | 3.32    | -50%         | 2.32    | -5%          | 5.88    | <-100%       | 3.08    | -39%         | ∞       | -∞           |
| 0                                                                                                  | 119 | 524                         | 525                 | 1.84                                                   | 1.84                                                                                                                                                                                                                                                             | 12%          | 2.18    | -5%          | 7.9      | <-100%       | 43.5     | <-100%       | 3.74    | -80%         | 2.36    | -13%         | 6.78    | <-100%       | 3.2     | -54%         | ∞       | -∞           |
| 0                                                                                                  | 359 | 1228                        | 1145                | 1.92                                                   | 1.92                                                                                                                                                                                                                                                             | -14%         | 1.54    | 8%           | 150      | <-100%       | 150      | <-100%       | 8.36    | <-100%       | 2.62    | -56%         | 150     | <-100%       | 5.68    | <-100%       | ∞       | -∞           |
| 15                                                                                                 | 29  | 65                          | 64                  | 9.14                                                   | 9.14                                                                                                                                                                                                                                                             | §            | 34      | §            | 4.5      | §            | ∞        | ∅            | ∞       | ∅            | ∞       | ∅            | ∞       | ∅            | ∞       | ∅            | ∞       | ∅            |
| 30                                                                                                 | 44  | 48                          | 66                  | 8.9                                                    | 8.9                                                                                                                                                                                                                                                              | §            | 27.25   | §            | ∞        | ∅            | 5.28     | §            | 5.86    | §            | 6.66    | §            | ∞       | ∅            | ∞       | ∅            | ∞       | ∅            |
| 30                                                                                                 | 59  | 113                         | 129                 | 5.04                                                   | 5.04                                                                                                                                                                                                                                                             | -46%         | 6.64    | -92%         | ∞        | -∞           | 5.64     | -63%         | 3       | 13%          | 3.4     | 2%           | ∞       | -∞           | ∞       | -∞           | ∞       | -∞           |
| 30                                                                                                 | 89  | 256                         | 247                 | 2.78                                                   | 2.78                                                                                                                                                                                                                                                             | -5%          | 3.5     | -33%         | ∞        | -∞           | 6.54     | <-100%       | 3.12    | -18%         | 2.26    | 14%          | 5.04    | -91%         | 2.94    | -11%         | ∞       | -∞           |
| 60                                                                                                 | 74  | 76                          | 61                  | 9.54                                                   | 9.54                                                                                                                                                                                                                                                             | §            | 47      | §            | ∞        | ∅            | ∞        | ∅            | ∞       | ∅            | 7.14    | §            | 4.08    | §            | 5.32    | §            | ∞       | -∞           |
| 60                                                                                                 | 89  | 143                         | 118                 | 5.42                                                   | 5.42                                                                                                                                                                                                                                                             | -55%         | 7.16    | <-100%       | ∞        | -∞           | ∞        | -∞           | ∞       | -∞           | 3.64    | -4%          | 4.36    | -25%         | 2.84    | 19%          | ∞       | -∞           |
| 90                                                                                                 | ∞   | 1331                        | 1274                | 114                                                    | 114                                                                                                                                                                                                                                                              | <-100%       | 1.92    | -16%         | ∞        | -∞           | ∞        | -∞           | ∞       | -∞           | ∞       | -∞           | ∞       | -∞           | ∞       | -∞           | ∞       | -∞           |
| 120                                                                                                | ∞   | 1203                        | 1158                | ∞                                                      | ∞                                                                                                                                                                                                                                                                | -∞           | 2.1     | -22%         | ∞        | -∞           | ∞        | -∞           | ∞       | -∞           | ∞       | -∞           | ∞       | -∞           | ∞       | -∞           | ∞       | -∞           |
| 180                                                                                                | ∞   | 993                         | 968                 | ∞                                                      | ∞                                                                                                                                                                                                                                                                | -∞           | 2.64    | -50%         | ∞        | -∞           | ∞        | -∞           | ∞       | -∞           | ∞       | -∞           | ∞       | -∞           | ∞       | -∞           | ∞       | -∞           |
| -∞                                                                                                 | ∞   | 1814                        | 1786                | 2.04                                                   | 2.04                                                                                                                                                                                                                                                             | -29%         | 1.58    | 0%           | 150      | <-100%       | 150      | <-100%       | 150     | <-100%       | 56      | <-100%       | 150     | <-100%       | 150     | <-100%       | 150     | <-100%       |

∅: The minimum detectable risk from the standard test is ∞ and the minimum detectable risk from the permutation test is >4.  
 -∞: The minimum detectable risk from the standard test is ∞ and the minimum detectable risk from the permutation test is finite.  
 §: The minimum detectable risk from the standard test is a number and the minimum detectable risk from the permutation test is >4.

**Table 1b. Minimum detectable relative risk at a given power for permutation test and standard tests that specify interval at increased risk, one-sided a-level of 0.025, Power = 0.95**

| Range of days between nearest vaccination and conception for subset of pregnancy at increased risk |     | Pregnancies                 |                     |                                                        | Minimum detectable relative risk (MDRR) from standard test among pregnancies in specified window of days between nearest vaccination and estimated conception date and Percent difference in minimum detectable RR of standard test compared to permutation test |              |         |              |          |              |          |              |         |              |         |              |         |              |         |              |         |              |
|----------------------------------------------------------------------------------------------------|-----|-----------------------------|---------------------|--------------------------------------------------------|------------------------------------------------------------------------------------------------------------------------------------------------------------------------------------------------------------------------------------------------------------------|--------------|---------|--------------|----------|--------------|----------|--------------|---------|--------------|---------|--------------|---------|--------------|---------|--------------|---------|--------------|
|                                                                                                    |     | Vaccine against Hepatitis A | Vaccine against HPV | Minimum detectable relative risk from permutation test | -∞ to ∞                                                                                                                                                                                                                                                          |              | 90 to ∞ |              | 120 to ∞ |              | 180 to ∞ |              | 0 to 14 |              | 0 to 29 |              | 0 to 44 |              | 0 to 59 |              | 0 to 89 |              |
|                                                                                                    |     |                             |                     |                                                        | MDRR                                                                                                                                                                                                                                                             | % difference | MDRR    | % difference | MDRR     | % difference | MDRR     | % difference | MDRR    | % difference | MDRR    | % difference | MDRR    | % difference | MDRR    | % difference | MDRR    | % difference |
| 0                                                                                                  | 14  | 75                          | 98                  | 3.6                                                    | 8.6                                                                                                                                                                                                                                                              | <-100%       | ∞       | -∞           | ∞        | -∞           | ∞        | -∞           | 3.02    | 16%          | 3.32    | 8%           | 3.72    | -3%          | 3.94    | -9%          | 4.86    | -35%         |
| 0                                                                                                  | 29  | 140                         | 162                 | 2.88                                                   | 5.6                                                                                                                                                                                                                                                              | -94%         | ∞       | -∞           | ∞        | -∞           | ∞        | -∞           | 3.08    | -7%          | 2.4     | 17%          | 2.64    | 8%           | 2.78    | 3%           | 2.98    | -3%          |
| 0                                                                                                  | 44  | 188                         | 228                 | 2.46                                                   | 3.8                                                                                                                                                                                                                                                              | -54%         | ∞       | -∞           | ∞        | -∞           | ∞        | -∞           | 3.16    | -28%         | 2.44    | 1%           | 2.18    | 11%          | 2.26    | 8%           | 2.4     | 2%           |
| 0                                                                                                  | 59  | 253                         | 291                 | 2.28                                                   | 3.2                                                                                                                                                                                                                                                              | -40%         | ∞       | -∞           | ∞        | -∞           | ∞        | -∞           | 3.22    | -41%         | 2.46    | -8%          | 2.2     | 4%           | 2       | 12%          | 2.1     | 8%           |
| 0                                                                                                  | 89  | 396                         | 409                 | 2.06                                                   | 2.56                                                                                                                                                                                                                                                             | -24%         | ∞       | -∞           | ∞        | -∞           | ∞        | -∞           | 3.38    | -64%         | 2.52    | -22%         | 2.22    | -8%          | 2.02    | 2%           | 1.8     | 13%          |
| 0                                                                                                  | 119 | 524                         | 525                 | 1.9                                                    | 2.22                                                                                                                                                                                                                                                             | -17%         | 8.82    | <-100%       | ∞        | -∞           | ∞        | -∞           | 3.56    | -87%         | 2.58    | -36%         | 2.26    | -19%         | 2.04    | -7%          | 1.8     | 5%           |
| 0                                                                                                  | 359 | 1228                        | 1145                | 1.6                                                    | 1.56                                                                                                                                                                                                                                                             | 3%           | 1.76    | -10%         | 1.9      | -19%         | 2.26     | -41%         | 26.5    | <-100%       | 2.98    | -86%         | 2.5     | -56%         | 2.18    | -36%         | 1.88    | -18%         |
| 15                                                                                                 | 29  | 65                          | 64                  | >4                                                     | 37                                                                                                                                                                                                                                                               | §            | ∞       | ∅            | ∞        | ∅            | ∞        | ∅            | ∞       | ∅            | 5.3     | §            | 6       | §            | 6.38    | §            | 6.92    | §            |
| 30                                                                                                 | 44  | 48                          | 66                  | >4                                                     | 30.25                                                                                                                                                                                                                                                            | §            | ∞       | ∅            | ∞        | ∅            | ∞        | ∅            | ∞       | ∅            | ∞       | ∅            | 5.86    | §            | 6.22    | §            | 6.74    | §            |
| 30                                                                                                 | 59  | 113                         | 129                 | 3.1                                                    | 6.78                                                                                                                                                                                                                                                             | <-100%       | ∞       | -∞           | ∞        | -∞           | ∞        | -∞           | ∞       | -∞           | ∞       | -∞           | 6.18    | -99%         | 3.24    | -5%          | 3.48    | -12%         |
| 30                                                                                                 | 89  | 256                         | 247                 | 2.38                                                   | 3.58                                                                                                                                                                                                                                                             | -50%         | ∞       | -∞           | ∞        | -∞           | ∞        | -∞           | ∞       | -∞           | ∞       | -∞           | 6.92    | <-100%       | 3.36    | -41%         | 2.3     | 3%           |
| 60                                                                                                 | 74  | 76                          | 61                  | 3.98                                                   | 49.25                                                                                                                                                                                                                                                            | <-100%       | ∞       | -∞           | ∞        | -∞           | ∞        | -∞           | ∞       | -∞           | ∞       | -∞           | ∞       | -∞           | ∞       | -∞           | 7.22    | -81%         |
| 60                                                                                                 | 89  | 143                         | 118                 | 3.06                                                   | 7.32                                                                                                                                                                                                                                                             | <-100%       | ∞       | -∞           | ∞        | -∞           | ∞        | -∞           | ∞       | -∞           | ∞       | -∞           | ∞       | -∞           | ∞       | -∞           | 3.92    | -28%         |
| 90                                                                                                 | ∞   | 1331                        | 1274                | 1.56                                                   | 1.5                                                                                                                                                                                                                                                              | 4%           | 1.42    | 9%           | 1.46     | 6%           | 1.5      | 4%           | ∞       | -∞           | ∞       | -∞           | ∞       | -∞           | ∞       | -∞           | ∞       | -∞           |
| 120                                                                                                | ∞   | 1203                        | 1158                | 1.6                                                    | 1.56                                                                                                                                                                                                                                                             | 3%           | 1.46    | 9%           | 1.44     | 10%          | 1.5      | 6%           | ∞       | -∞           | ∞       | -∞           | ∞       | -∞           | ∞       | -∞           | ∞       | -∞           |
| 180                                                                                                | ∞   | 993                         | 968                 | 1.64                                                   | 1.66                                                                                                                                                                                                                                                             | -1%          | 1.56    | 5%           | 1.54     | 6%           | 1.5      | 9%           | ∞       | -∞           | ∞       | -∞           | ∞       | -∞           | ∞       | -∞           | ∞       | -∞           |
| -∞                                                                                                 | ∞   | 1814                        | 1786                | 1.48                                                   | 1.36                                                                                                                                                                                                                                                             | 8%           | 1.44    | 3%           | 1.46     | 1%           | 1.52     | -3%          | >500    | -∞           | 4.82    | <-100%       | 2.82    | -91%         | 2.38    | -61%         | 1.98    | -34%         |
| 0                                                                                                  | 14  | 75                          | 98                  | 3.6                                                    | 5.26                                                                                                                                                                                                                                                             | -46%         | 6.98    | -94%         | ∞        | -∞           | ∞        | -∞           | ∞       | -∞           | ∞       | -∞           | ∞       | -∞           | ∞       | -∞           | ∞       | -∞           |
| 0                                                                                                  | 29  | 140                         | 162                 | 2.88                                                   | 3.2                                                                                                                                                                                                                                                              | -11%         | 4.62    | -60%         | 3.48     | -21%         | ∞        | -∞           | ∞       | -∞           | ∞       | -∞           | ∞       | -∞           | ∞       | -∞           | ∞       | -∞           |
| 0                                                                                                  | 44  | 188                         | 228                 | 2.46                                                   | 2.56                                                                                                                                                                                                                                                             | -4%          | 3.2     | -30%         | 3.74     | -52%         | 4.88     | -98%         | 5.42    | <-100%       | 6.26    | <-100%       | ∞       | -∞           | ∞       | -∞           | ∞       | -∞           |
| 0                                                                                                  | 59  | 253                         | 291                 | 2.28                                                   | 2.22                                                                                                                                                                                                                                                             | 3%           | 2.72    | -19%         | 4.02     | -76%         | 5.2      | <-100%       | 2.7     | -18%         | 3.06    | -34%         | ∞       | -∞           | ∞       | -∞           | ∞       | -∞           |
| 0                                                                                                  | 89  | 396                         | 409                 | 2.06                                                   | 1.88                                                                                                                                                                                                                                                             | 9%           | 2.24    | -9%          | 4.62     | <-100%       | 5.9      | <-100%       | 2.78    | -35%         | 2.06    | 0%           | 4.04    | -96%         | 2.62    | -27%         | ∞       | -∞           |
| 0                                                                                                  | 119 | 524                         | 525                 | 1.9                                                    | 1.68                                                                                                                                                                                                                                                             | 12%          | 1.96    | -3%          | 5.28     | <-100%       | 6.88     | <-100%       | 2.86    | -51%         | 2.08    | -9%          | 4.6     | <-100%       | 2.68    | -41%         | ∞       | -∞           |
| 0                                                                                                  | 359 | 1228                        | 1145                | 1.6                                                    | 1.74                                                                                                                                                                                                                                                             | -9%          | 1.44    | 10%          | 150      | <-100%       | 150      | <-100%       | 4       | <-100%       | 2.24    | -40%         | 34.5    | <-100%       | 3.12    | -95%         | ∞       | -∞           |
| 15                                                                                                 | 29  | 65                          | 64                  | >4                                                     | 7.52                                                                                                                                                                                                                                                             | §            | 10      | §            | 3.3      | §            | ∞        | ∅            | ∞       | ∅            | ∞       | ∅            | ∞       | ∅            | ∞       | ∅            | ∞       | ∅            |
| 30                                                                                                 | 44  | 48                          | 66                  | >4                                                     | 7.34                                                                                                                                                                                                                                                             | §            | 9.88    | §            | ∞        | ∅            | 3.96     | §            | 4.8     | §            | 5.52    | §            | ∞       | ∅            | ∞       | ∅            | ∞       | ∅            |
| 30                                                                                                 | 59  | 113                         | 129                 | 3.1                                                    | 3.74                                                                                                                                                                                                                                                             | -21%         | 5.54    | -79%         | ∞        | -∞           | 4.3      | -39%         | 2.6     | 16%          | 2.94    | 5%           | ∞       | -∞           | ∞       | -∞           | ∞       | -∞           |
| 30                                                                                                 | 89  | 256                         | 247                 | 2.38                                                   | 2.44                                                                                                                                                                                                                                                             | -3%          | 3.04    | -28%         | ∞        | -∞           | 5        | <-100%       | 2.68    | -13%         | 2.02    | 15%          | 3.4     | -43%         | 2.52    | -6%          | ∞       | -∞           |
| 60                                                                                                 | 74  | 76                          | 61                  | 3.98                                                   | 7.84                                                                                                                                                                                                                                                             | -97%         | 10.75   | <-100%       | ∞        | -∞           | ∞        | -∞           | ∞       | -∞           | 5.88    | -48%         | 3.16    | 21%          | 4.84    | -22%         | ∞       | -∞           |
| 60                                                                                                 | 89  | 143                         | 118                 | 3.06                                                   | 4.52                                                                                                                                                                                                                                                             | -48%         | 5.98    | -95%         | ∞        | -∞           | ∞        | -∞           | ∞       | -∞           | 3.12    | -2%          | 3.24    | -6%          | 2.46    | 20%          | ∞       | -∞           |
| 90                                                                                                 | ∞   | 1331                        | 1274                | 1.56                                                   | >500                                                                                                                                                                                                                                                             | -∞           | 1.74    | -12%         | ∞        | -∞           | ∞        | -∞           | ∞       | -∞           | ∞       | -∞           | ∞       | -∞           | ∞       | -∞           | ∞       | -∞           |
| 120                                                                                                | ∞   | 1203                        | 1158                | 1.6                                                    | ∞                                                                                                                                                                                                                                                                | -∞           | 1.88    | -18%         | ∞        | -∞           | ∞        | -∞           | ∞       | -∞           | ∞       | -∞           | ∞       | -∞           | ∞       | -∞           | ∞       | -∞           |
| 180                                                                                                | ∞   | 993                         | 968                 | 1.64                                                   | ∞                                                                                                                                                                                                                                                                | -∞           | 2.3     | -40%         | ∞        | -∞           | ∞        | -∞           | ∞       | -∞           | ∞       | -∞           | ∞       | -∞           | ∞       | -∞           | ∞       | -∞           |
| -∞                                                                                                 | ∞   | 1814                        | 1786                | 1.48                                                   | 1.8                                                                                                                                                                                                                                                              | -22%         | 1.46    | 1%           | 150      | <-100%       | 150      | <-100%       | 44.75   | <-100%       | 2.42    | -64%         | 150     | <-100%       | 5.42    | <-100%       | ∞       | -∞           |

∅: The minimum detectable risk from the standard test is ∞ and the minimum detectable risk from the permutation test is >4.

-∞: The minimum detectable risk from the standard test is ∞ and the minimum detectable risk from the permutation test is finite.

§: The minimum detectable risk from the standard test is a number and the minimum detectable risk from the permutation test is >4.

Table 1c. Minimum detectable relative risk at a given power for permutation test and standard tests that specify interval at increased risk, one-sided a-level of 0.025, Power = 0.90

| Range of days between nearest vaccination and conception for subset of pregnancy at increased risk |     | Pregnancies                 |                     | Minimum detectable relative risk from permutation test | Minimum detectable relative risk (MDRR) from standard test among pregnancies in specified window of days between nearest vaccination and estimated conception date and Percent difference in minimum detectable RR of standard test compared to permutation test |              |         |              |          |              |          |              |         |              |         |              |         |              |         |              |         |              |
|----------------------------------------------------------------------------------------------------|-----|-----------------------------|---------------------|--------------------------------------------------------|------------------------------------------------------------------------------------------------------------------------------------------------------------------------------------------------------------------------------------------------------------------|--------------|---------|--------------|----------|--------------|----------|--------------|---------|--------------|---------|--------------|---------|--------------|---------|--------------|---------|--------------|
|                                                                                                    |     |                             |                     |                                                        | -∞ to ∞                                                                                                                                                                                                                                                          |              | 90 to ∞ |              | 120 to ∞ |              | 180 to ∞ |              | 0 to 14 |              | 0 to 29 |              | 0 to 44 |              | 0 to 59 |              | 0 to 89 |              |
|                                                                                                    |     |                             |                     |                                                        | MDRR                                                                                                                                                                                                                                                             | % difference | MDRR    | % difference | MDRR     | % difference | MDRR     | % difference | MDRR    | % difference | MDRR    | % difference | MDRR    | % difference | MDRR    | % difference | MDRR    | % difference |
| Start                                                                                              | End | Vaccine against Hepatitis A | Vaccine against HPV |                                                        |                                                                                                                                                                                                                                                                  |              |         |              |          |              |          |              |         |              |         |              |         |              |         |              |         |              |
| 0                                                                                                  | 14  | 75                          | 98                  | 3.36                                                   | 7.7                                                                                                                                                                                                                                                              | <-100%       | ∞       | -∞           | ∞        | -∞           | ∞        | -∞           | 2.76    | 17.9%        | 3.02    | 10.1%        | 3.38    | -0.6%        | 3.58    | -6.5%        | 3.88    | -15.5%       |
| 0                                                                                                  | 29  | 140                         | 162                 | 2.66                                                   | 5.06                                                                                                                                                                                                                                                             | -90.2%       | ∞       | -∞           | ∞        | -∞           | ∞        | -∞           | 2.8     | -5.3%        | 2.22    | 16.5%        | 2.44    | 8.3%         | 2.56    | 3.8%         | 2.74    | -3.0%        |
| 0                                                                                                  | 44  | 188                         | 228                 | 2.32                                                   | 3.48                                                                                                                                                                                                                                                             | -50.0%       | ∞       | -∞           | ∞        | -∞           | ∞        | -∞           | 2.86    | -23.3%       | 2.24    | 3.4%         | 2.02    | 12.9%        | 2.12    | 8.6%         | 2.24    | 3.4%         |
| 0                                                                                                  | 59  | 253                         | 291                 | 2.2                                                    | 2.94                                                                                                                                                                                                                                                             | -33.6%       | ∞       | -∞           | ∞        | -∞           | ∞        | -∞           | 2.92    | -32.7%       | 2.28    | -3.6%        | 2.04    | 7.3%         | 1.88    | 14.5%        | 1.98    | 10.0%        |
| 0                                                                                                  | 89  | 396                         | 409                 | 1.9                                                    | 2.38                                                                                                                                                                                                                                                             | -25.3%       | ∞       | -∞           | ∞        | -∞           | ∞        | -∞           | 3.02    | -58.9%       | 2.32    | -22.1%       | 2.06    | -8.4%        | 1.9     | 0.0%         | 1.7     | 10.5%        |
| 0                                                                                                  | 119 | 524                         | 525                 | 1.78                                                   | 2.08                                                                                                                                                                                                                                                             | -16.9%       | 7.54    | <-100%       | ∞        | -∞           | ∞        | -∞           | 3.14    | -76.4%       | 2.36    | -32.6%       | 2.1     | -18.0%       | 1.92    | -7.9%        | 1.7     | 4.5%         |
| 0                                                                                                  | 359 | 1228                        | 1145                | 1.52                                                   | 1.5                                                                                                                                                                                                                                                              | 1.3%         | 1.68    | -10.5%       | 1.78     | -17.1%       | 2.1      | -38.2%       | 6       | <-100%       | 2.62    | -72.4%       | 2.26    | -48.7%       | 2.02    | -32.9%       | 1.76    | -15.8%       |
| 15                                                                                                 | 29  | 65                          | 64                  | 3.88                                                   | 17                                                                                                                                                                                                                                                               | <-100%       | ∞       | -∞           | ∞        | -∞           | ∞        | -∞           | ∞       | -∞           | 4.72    | -21.6%       | 5.36    | -38.1%       | 5.7     | -46.9%       | 6.18    | -59.3%       |
| 30                                                                                                 | 44  | 48                          | 66                  | 3.86                                                   | 12.25                                                                                                                                                                                                                                                            | <-100%       | ∞       | -∞           | ∞        | -∞           | ∞        | -∞           | ∞       | -∞           | ∞       | -∞           | 5.22    | -35.2%       | 5.56    | -44.0%       | 6.02    | -56.0%       |
| 30                                                                                                 | 59  | 113                         | 129                 | 2.88                                                   | 6.08                                                                                                                                                                                                                                                             | <-100%       | ∞       | -∞           | ∞        | -∞           | ∞        | -∞           | ∞       | -∞           | ∞       | -∞           | 5.46    | -89.6%       | 2.96    | -2.8%        | 3.18    | -10.4%       |
| 30                                                                                                 | 89  | 256                         | 247                 | 2.24                                                   | 3.28                                                                                                                                                                                                                                                             | -46.4%       | ∞       | -∞           | ∞        | -∞           | ∞        | -∞           | ∞       | -∞           | ∞       | -∞           | 5.98    | <-100%       | 3.06    | -36.6%       | 2.14    | 4.5%         |
| 60                                                                                                 | 74  | 76                          | 61                  | 3.82                                                   | 25.5                                                                                                                                                                                                                                                             | <-100%       | ∞       | -∞           | ∞        | -∞           | ∞        | -∞           | ∞       | -∞           | ∞       | -∞           | ∞       | -∞           | ∞       | -∞           | 6.44    | -68.6%       |
| 60                                                                                                 | 89  | 143                         | 118                 | 2.9                                                    | 6.56                                                                                                                                                                                                                                                             | <-100%       | ∞       | -∞           | ∞        | -∞           | ∞        | -∞           | ∞       | -∞           | ∞       | -∞           | ∞       | -∞           | ∞       | -∞           | 3.38    | -16.6%       |
| 90                                                                                                 | ∞   | 1331                        | 1274                | 1.5                                                    | 1.46                                                                                                                                                                                                                                                             | 2.7%         | 1.38    | 8.0%         | 1.4      | 6.7%         | 1.44     | 4.0%         | ∞       | -∞           | ∞       | -∞           | ∞       | -∞           | ∞       | -∞           | ∞       | -∞           |
| 120                                                                                                | ∞   | 1203                        | 1158                | 1.52                                                   | 1.5                                                                                                                                                                                                                                                              | 1.3%         | 1.42    | 6.6%         | 1.4      | 7.9%         | 1.44     | 5.3%         | ∞       | -∞           | ∞       | -∞           | ∞       | -∞           | ∞       | -∞           | ∞       | -∞           |
| 180                                                                                                | ∞   | 993                         | 968                 | 1.58                                                   | 1.6                                                                                                                                                                                                                                                              | -1.3%        | 1.5     | 5.1%         | 1.48     | 6.3%         | 1.44     | 8.9%         | ∞       | -∞           | ∞       | -∞           | ∞       | -∞           | ∞       | -∞           | ∞       | -∞           |
| -∞                                                                                                 | ∞   | 1814                        | 1786                | 1.44                                                   | 1.32                                                                                                                                                                                                                                                             | 8.3%         | 1.4     | 2.8%         | 1.42     | 1.4%         | 1.46     | -1.4%        | 150     | <-100%       | 3.04    | <-100%       | 2.48    | -72.2%       | 2.14    | -48.6%       | 1.84    | -27.8%       |
| 0                                                                                                  | 14  | 75                          | 98                  | 3.36                                                   | 4.75                                                                                                                                                                                                                                                             | -41.4%       | 6.5     | -93.5%       | ∞        | -∞           | ∞        | -∞           | ∞       | -∞           | ∞       | -∞           | ∞       | -∞           | ∞       | -∞           | ∞       | -∞           |
| 0                                                                                                  | 29  | 140                         | 162                 | 2.66                                                   | 2.94                                                                                                                                                                                                                                                             | -10.5%       | 3.74    | -40.6%       | 3.1      | -16.5%       | ∞        | -∞           | ∞       | -∞           | ∞       | -∞           | ∞       | -∞           | ∞       | -∞           | ∞       | -∞           |
| 0                                                                                                  | 44  | 188                         | 228                 | 2.32                                                   | 2.38                                                                                                                                                                                                                                                             | -2.6%        | 2.94    | -26.7%       | 3.18     | -37.1%       | 3.8      | -63.8%       | 4.72    | <-100%       | 5.48    | <-100%       | ∞       | -∞           | ∞       | -∞           | ∞       | -∞           |
| 0                                                                                                  | 59  | 253                         | 291                 | 2.2                                                    | 2.08                                                                                                                                                                                                                                                             | 5.5%         | 2.52    | -14.5%       | 3.24     | -47.3%       | 4.1      | -86.4%       | 2.46    | -11.8%       | 2.8     | -27.3%       | ∞       | -∞           | ∞       | -∞           | ∞       | -∞           |
| 0                                                                                                  | 89  | 396                         | 409                 | 1.9                                                    | 1.78                                                                                                                                                                                                                                                             | 6.3%         | 2.08    | -9.5%        | 3.48     | -83.2%       | 4.74     | <-100%       | 2.52    | -32.6%       | 1.92    | -1.1%        | 3.22    | -69.5%       | 2.4     | -26.3%       | ∞       | -∞           |
| 0                                                                                                  | 119 | 524                         | 525                 | 1.78                                                   | 1.6                                                                                                                                                                                                                                                              | 10.1%        | 1.86    | -4.5%        | 3.94     | <-100%       | 5.42     | <-100%       | 2.58    | -44.9%       | 1.94    | -9.0%        | 3.36    | -88.8%       | 2.44    | -37.1%       | ∞       | -∞           |
| 0                                                                                                  | 359 | 1228                        | 1145                | 1.52                                                   | 1.64                                                                                                                                                                                                                                                             | -7.9%        | 1.4     | 7.9%         | 8.58     | <-100%       | 150      | <-100%       | 3       | -97.4%       | 2.06    | -35.5%       | 6.5     | <-100%       | 2.74    | -80.3%       | ∞       | -∞           |
| 15                                                                                                 | 29  | 65                          | 64                  | 3.88                                                   | 6.76                                                                                                                                                                                                                                                             | -74.2%       | 9.06    | <-100%       | 3        | 22.7%        | ∞        | -∞           | ∞       | -∞           | ∞       | -∞           | ∞       | -∞           | ∞       | -∞           | ∞       | -∞           |
| 30                                                                                                 | 44  | 48                          | 66                  | 3.86                                                   | 6.56                                                                                                                                                                                                                                                             | -69.9%       | 8.82    | <-100%       | ∞        | -∞           | 3.3      | 14.5%        | 3.72    | 3.6%         | 5       | -29.5%       | ∞       | -∞           | ∞       | -∞           | ∞       | -∞           |
| 30                                                                                                 | 59  | 113                         | 129                 | 2.88                                                   | 3.42                                                                                                                                                                                                                                                             | -18.8%       | 5       | -73.6%       | ∞        | -∞           | 3.4      | -18.1%       | 2.4     | 16.7%        | 2.7     | 6.2%         | ∞       | -∞           | ∞       | -∞           | ∞       | -∞           |
| 30                                                                                                 | 89  | 256                         | 247                 | 2.24                                                   | 2.28                                                                                                                                                                                                                                                             | -1.8%        | 2.8     | -25.0%       | ∞        | -∞           | 3.58     | -59.8%       | 2.44    | -8.9%        | 1.9     | 15.2%        | 3.06    | -36.6%       | 2.34    | -4.5%        | ∞       | -∞           |
| 60                                                                                                 | 74  | 76                          | 61                  | 3.82                                                   | 7.02                                                                                                                                                                                                                                                             | -83.8%       | 9.46    | <-100%       | ∞        | -∞           | ∞        | -∞           | ∞       | -∞           | 5.5     | -44.0%       | 2.9     | 24.1%        | 3.48    | 8.9%         | ∞       | -∞           |
| 60                                                                                                 | 89  | 143                         | 118                 | 2.9                                                    | 3.74                                                                                                                                                                                                                                                             | -29.0%       | 5.38    | -85.5%       | ∞        | -∞           | ∞        | -∞           | ∞       | -∞           | 2.86    | 1.4%         | 2.94    | -1.4%        | 2.28    | 21.4%        | ∞       | -∞           |
| 90                                                                                                 | ∞   | 1331                        | 1274                | 1.5                                                    | 7.75                                                                                                                                                                                                                                                             | <-100%       | 1.64    | -9.3%        | ∞        | -∞           | ∞        | -∞           | ∞       | -∞           | ∞       | -∞           | ∞       | -∞           | ∞       | -∞           | ∞       | -∞           |
| 120                                                                                                | ∞   | 1203                        | 1158                | 1.52                                                   | ∞                                                                                                                                                                                                                                                                | -∞           | 1.78    | -17.1%       | ∞        | -∞           | ∞        | -∞           | ∞       | -∞           | ∞       | -∞           | ∞       | -∞           | ∞       | -∞           | ∞       | -∞           |
| 180                                                                                                | ∞   | 993                         | 968                 | 1.58                                                   | ∞                                                                                                                                                                                                                                                                | -∞           | 2.14    | -35.4%       | ∞        | -∞           | ∞        | -∞           | ∞       | -∞           | ∞       | -∞           | ∞       | -∞           | ∞       | -∞           | ∞       | -∞           |
| -∞                                                                                                 | ∞   | 1814                        | 1786                | 1.44                                                   | 1.7                                                                                                                                                                                                                                                              | -18.1%       | 1.42    | 1.4%         | 150      | <-100%       | 150      | <-100%       | 78.75   | <-100%       | 2.25    | -56.3%       | 150     | <-100%       | 3.25    | <-100%       | ∞       | -∞           |

-∞: The minimum detectable risk from the standard test is ∞ and the minimum detectable risk from the permutation test is finite.

Table 1d. Minimum detectable relative risk at a given power for permutation test and standard tests that specify interval at increased risk, one-sided a-level of 0.025, Power = 0.80

| Range of days between nearest vaccination and conception for subset of pregnancy at increased risk |     | Pregnancies                 |                     | Minimum detectable relative risk from permutation test | Minimum detectable relative risk (MDRR) from standard test among pregnancies in specified window of days between nearest vaccination and estimated conception date and Percent difference in minimum detectable RR of standard test compared to permutation test |              |         |              |          |              |          |              |         |              |         |              |         |              |         |              |         |              |
|----------------------------------------------------------------------------------------------------|-----|-----------------------------|---------------------|--------------------------------------------------------|------------------------------------------------------------------------------------------------------------------------------------------------------------------------------------------------------------------------------------------------------------------|--------------|---------|--------------|----------|--------------|----------|--------------|---------|--------------|---------|--------------|---------|--------------|---------|--------------|---------|--------------|
|                                                                                                    |     |                             |                     |                                                        | -∞ to ∞                                                                                                                                                                                                                                                          |              | 90 to ∞ |              | 120 to ∞ |              | 180 to ∞ |              | 0 to 14 |              | 0 to 29 |              | 0 to 44 |              | 0 to 59 |              | 0 to 89 |              |
|                                                                                                    |     |                             |                     |                                                        | MDRR                                                                                                                                                                                                                                                             | % difference | MDRR    | % difference | MDRR     | % difference | MDRR     | % difference | MDRR    | % difference | MDRR    | % difference | MDRR    | % difference | MDRR    | % difference | MDRR    | % difference |
| Start                                                                                              | End | Vaccine against Hepatitis A | Vaccine against HPV |                                                        |                                                                                                                                                                                                                                                                  |              |         |              |          |              |          |              |         |              |         |              |         |              |         |              |         |              |
| 0                                                                                                  | 14  | 75                          | 98                  | 3.06                                                   | 6.64                                                                                                                                                                                                                                                             | <-100%       | ∞       | -∞           | ∞        | -∞           | ∞        | -∞           | 2.46    | 20%          | 2.7     | 12%          | 3       | 2%           | 3.16    | -3%          | 3.42    | -12%         |
| 0                                                                                                  | 29  | 140                         | 162                 | 2.46                                                   | 3.94                                                                                                                                                                                                                                                             | -60%         | ∞       | -∞           | ∞        | -∞           | ∞        | -∞           | 2.5     | -2%          | 2.02    | 18%          | 2.2     | 11%          | 2.32    | 6%           | 2.48    | -1%          |
| 0                                                                                                  | 44  | 188                         | 228                 | 2.2                                                    | 3.1                                                                                                                                                                                                                                                              | -41%         | ∞       | -∞           | ∞        | -∞           | ∞        | -∞           | 2.52    | -15%         | 2.04    | 7%           | 1.86    | 15%          | 1.94    | 12%          | 2.04    | 7%           |
| 0                                                                                                  | 59  | 253                         | 291                 | 2.02                                                   | 2.64                                                                                                                                                                                                                                                             | -31%         | ∞       | -∞           | ∞        | -∞           | ∞        | -∞           | 2.56    | -27%         | 2.06    | -2%          | 1.88    | 7%           | 1.74    | 14%          | 1.82    | 10%          |
| 0                                                                                                  | 89  | 396                         | 409                 | 1.8                                                    | 2.18                                                                                                                                                                                                                                                             | -21%         | ∞       | -∞           | ∞        | -∞           | ∞        | -∞           | 2.62    | -46%         | 2.08    | -16%         | 1.88    | -4%          | 1.74    | 3%           | 1.58    | 12%          |
| 0                                                                                                  | 119 | 524                         | 525                 | 1.7                                                    | 1.92                                                                                                                                                                                                                                                             | -13%         | 6.25    | <-100%       | ∞        | -∞           | ∞        | -∞           | 2.7     | -59%         | 2.12    | -25%         | 1.9     | -12%         | 1.76    | -4%          | 1.6     | 6%           |
| 0                                                                                                  | 359 | 1228                        | 1145                | 1.46                                                   | 1.42                                                                                                                                                                                                                                                             | 3%           | 1.58    | -8%          | 1.66     | -14%         | 1.9      | -30%         | 3.2     | <-100%       | 2.28    | -56%         | 2.02    | -38%         | 1.84    | -26%         | 1.64    | -12%         |
| 15                                                                                                 | 29  | 65                          | 64                  | 3.58                                                   | 9.64                                                                                                                                                                                                                                                             | <-100%       | ∞       | -∞           | ∞        | -∞           | ∞        | -∞           | ∞       | -∞           | 3.58    | 0%           | 4.62    | -29%         | 4.92    | -37%         | 5.34    | -49%         |
| 30                                                                                                 | 44  | 48                          | 66                  | 3.56                                                   | 9.38                                                                                                                                                                                                                                                             | <-100%       | ∞       | -∞           | ∞        | -∞           | ∞        | -∞           | ∞       | -∞           | ∞       | -∞           | 4.44    | -25%         | 4.8     | -35%         | 5.22    | -47%         |
| 30                                                                                                 | 59  | 113                         | 129                 | 2.66                                                   | 5.28                                                                                                                                                                                                                                                             | -98%         | ∞       | -∞           | ∞        | -∞           | ∞        | -∞           | ∞       | -∞           | ∞       | -∞           | 4.66    | -75%         | 2.64    | 1%           | 2.84    | -7%          |
| 30                                                                                                 | 89  | 256                         | 247                 | 2.1                                                    | 2.94                                                                                                                                                                                                                                                             | -40%         | ∞       | -∞           | ∞        | -∞           | ∞        | -∞           | ∞       | -∞           | ∞       | -∞           | 5       | <-100%       | 2.72    | -30%         | 1.96    | 7%           |
| 60                                                                                                 | 74  | 76                          | 61                  | 3.52                                                   | 10.25                                                                                                                                                                                                                                                            | <-100%       | ∞       | -∞           | ∞        | -∞           | ∞        | -∞           | ∞       | -∞           | ∞       | -∞           | ∞       | -∞           | ∞       | -∞           | 5.56    | -58%         |
| 60                                                                                                 | 89  | 143                         | 118                 | 2.68                                                   | 5.68                                                                                                                                                                                                                                                             | <-100%       | ∞       | -∞           | ∞        | -∞           | ∞        | -∞           | ∞       | -∞           | ∞       | -∞           | ∞       | -∞           | ∞       | -∞           | 3.02    | -13%         |
| 90                                                                                                 | ∞   | 1331                        | 1274                | 1.44                                                   | 1.38                                                                                                                                                                                                                                                             | 4%           | 1.32    | 8%           | 1.34     | 7%           | 1.38     | 4%           | ∞       | -∞           | ∞       | -∞           | ∞       | -∞           | ∞       | -∞           | ∞       | -∞           |
| 120                                                                                                | ∞   | 1203                        | 1158                | 1.46                                                   | 1.42                                                                                                                                                                                                                                                             | 3%           | 1.36    | 7%           | 1.34     | 8%           | 1.38     | 5%           | ∞       | -∞           | ∞       | -∞           | ∞       | -∞           | ∞       | -∞           | ∞       | -∞           |
| 180                                                                                                | ∞   | 993                         | 968                 | 1.52                                                   | 1.5                                                                                                                                                                                                                                                              | 1%           | 1.42    | 7%           | 1.4      | 8%           | 1.38     | 9%           | ∞       | -∞           | ∞       | -∞           | ∞       | -∞           | ∞       | -∞           | ∞       | -∞           |
| -∞                                                                                                 | ∞   | 1814                        | 1786                | 1.38                                                   | 1.28                                                                                                                                                                                                                                                             | 7%           | 1.34    | 3%           | 1.34     | 3%           | 1.38     | 0%           | 6.6     | <-100%       | 2.5     | -81%         | 2.14    | -55%         | 1.92    | -39%         | 1.68    | -22%         |
| 0                                                                                                  | 14  | 75                          | 98                  | 3.06                                                   | 3.7                                                                                                                                                                                                                                                              | -21%         | 5.5     | -80%         | ∞        | -∞           | ∞        | -∞           | ∞       | -∞           | ∞       | -∞           | ∞       | -∞           | ∞       | -∞           | ∞       | -∞           |
| 0                                                                                                  | 29  | 140                         | 162                 | 2.46                                                   | 2.64                                                                                                                                                                                                                                                             | -7%          | 3.32    | -35%         | 2.74     | -11%         | ∞        | -∞           | ∞       | -∞           | ∞       | -∞           | ∞       | -∞           | ∞       | -∞           | ∞       | -∞           |
| 0                                                                                                  | 44  | 188                         | 228                 | 2.2                                                    | 2.16                                                                                                                                                                                                                                                             | 2%           | 2.64    | -20%         | 2.78     | -26%         | 3.06     | -39%         | 3.46    | -57%         | 4.66    | <-100%       | ∞       | -∞           | ∞       | -∞           | ∞       | -∞           |
| 0                                                                                                  | 59  | 253                         | 291                 | 2.02                                                   | 1.92                                                                                                                                                                                                                                                             | 5%           | 2.3     | -14%         | 2.82     | -40%         | 3.14     | -55%         | 2.22    | -10%         | 2.5     | -24%         | ∞       | -∞           | ∞       | -∞           | ∞       | -∞           |
| 0                                                                                                  | 89  | 396                         | 409                 | 1.8                                                    | 1.66                                                                                                                                                                                                                                                             | 8%           | 1.92    | -7%          | 2.92     | -62%         | 3.28     | -82%         | 2.26    | -26%         | 1.78    | 1%           | 2.78    | -54%         | 2.16    | -20%         | ∞       | -∞           |
| 0                                                                                                  | 119 | 524                         | 525                 | 1.7                                                    | 1.52                                                                                                                                                                                                                                                             | 11%          | 1.72    | -1%          | 3.02     | -78%         | 3.62     | <-100%       | 2.28    | -34%         | 1.78    | -5%          | 2.88    | -69%         | 2.18    | -28%         | ∞       | -∞           |
| 0                                                                                                  | 359 | 1228                        | 1145                | 1.46                                                   | 1.54                                                                                                                                                                                                                                                             | -5%          | 1.34    | 8%           | 4.76     | <-100%       | 7.84     | <-100%       | 2.54    | -74%         | 1.86    | -27%         | 3.46    | <-100%       | 2.36    | -62%         | ∞       | -∞           |
| 15                                                                                                 | 29  | 65                          | 64                  | 3.58                                                   | 5.82                                                                                                                                                                                                                                                             | -63%         | 7.8     | <-100%       | 2.66     | 26%          | ∞        | -∞           | ∞       | -∞           | ∞       | -∞           | ∞       | -∞           | ∞       | -∞           | ∞       | -∞           |
| 30                                                                                                 | 44  | 48                          | 66                  | 3.56                                                   | 5.66                                                                                                                                                                                                                                                             | -59%         | 7.6     | <-100%       | ∞        | -∞           | 2.92     | 18%          | 3.28    | 8%           | 3.8     | -7%          | ∞       | -∞           | ∞       | -∞           | ∞       | -∞           |
| 30                                                                                                 | 59  | 113                         | 129                 | 2.66                                                   | 3.04                                                                                                                                                                                                                                                             | -14%         | 3.9     | -47%         | ∞        | -∞           | 2.96     | -11%         | 2.16    | 19%          | 2.44    | 8%           | ∞       | -∞           | ∞       | -∞           | ∞       | -∞           |
| 30                                                                                                 | 89  | 256                         | 247                 | 2.1                                                    | 2.08                                                                                                                                                                                                                                                             | 1%           | 2.52    | -20%         | ∞        | -∞           | 3.08     | -47%         | 2.2     | -5%          | 1.76    | 16%          | 2.68    | -28%         | 2.12    | -1%          | ∞       | -∞           |
| 60                                                                                                 | 74  | 76                          | 61                  | 3.52                                                   | 6.04                                                                                                                                                                                                                                                             | -72%         | 8.1     | <-100%       | ∞        | -∞           | ∞        | -∞           | ∞       | -∞           | 4.56    | -30%         | 2.58    | 27%          | 3.08    | 13%          | ∞       | -∞           |
| 60                                                                                                 | 89  | 143                         | 118                 | 2.68                                                   | 3.24                                                                                                                                                                                                                                                             | -21%         | 4.7     | -75%         | ∞        | -∞           | ∞        | -∞           | ∞       | -∞           | 2.56    | 4%           | 2.6     | 3%           | 2.08    | 22%          | ∞       | -∞           |
| 90                                                                                                 | ∞   | 1331                        | 1274                | 1.44                                                   | 6                                                                                                                                                                                                                                                                | <-100%       | 1.54    | -7%          | ∞        | -∞           | ∞        | -∞           | ∞       | -∞           | ∞       | -∞           | ∞       | -∞           | ∞       | -∞           | ∞       | -∞           |
| 120                                                                                                | ∞   | 1203                        | 1158                | 1.46                                                   | ∞                                                                                                                                                                                                                                                                | -∞           | 1.64    | -12%         | ∞        | -∞           | ∞        | -∞           | ∞       | -∞           | ∞       | -∞           | ∞       | -∞           | ∞       | -∞           | ∞       | -∞           |
| 180                                                                                                | ∞   | 993                         | 968                 | 1.52                                                   | ∞                                                                                                                                                                                                                                                                | -∞           | 1.96    | -29%         | ∞        | -∞           | ∞        | -∞           | ∞       | -∞           | ∞       | -∞           | ∞       | -∞           | ∞       | -∞           | ∞       | -∞           |
| -∞                                                                                                 | ∞   | 1814                        | 1786                | 1.38                                                   | 1.58                                                                                                                                                                                                                                                             | -14%         | 1.34    | 3%           | 150      | <-100%       | 150      | <-100%       | 2.88    | <-100%       | 1.94    | -41%         | 7.68    | <-100%       | 2.62    | -90%         | ∞       | -∞           |

-∞: The minimum detectable risk from the standard test is ∞ and the minimum detectable risk from the permutation test is finite.

Table 1e. Minimum detectable relative risk at a given power for permutation test and standard tests that specify interval at increased risk, one-sided a-level of 0.025, Power = 0.50

| Range of days between nearest vaccination and conception for subset of pregnancy at increased risk |     | Pregnancies                 |                     |                                                        | Minimum detectable relative risk (MDRR) from standard test among pregnancies in specified window of days between nearest vaccination and estimated conception date and Percent difference in minimum detectable RR of standard test compared to permutation test |              |         |              |          |              |          |              |         |              |         |              |         |              |         |              |         |              |
|----------------------------------------------------------------------------------------------------|-----|-----------------------------|---------------------|--------------------------------------------------------|------------------------------------------------------------------------------------------------------------------------------------------------------------------------------------------------------------------------------------------------------------------|--------------|---------|--------------|----------|--------------|----------|--------------|---------|--------------|---------|--------------|---------|--------------|---------|--------------|---------|--------------|
|                                                                                                    |     |                             |                     |                                                        | -∞ to ∞                                                                                                                                                                                                                                                          |              | 90 to ∞ |              | 120 to ∞ |              | 180 to ∞ |              | 0 to 14 |              | 0 to 29 |              | 0 to 44 |              | 0 to 59 |              | 0 to 89 |              |
|                                                                                                    |     |                             |                     |                                                        | MDRR                                                                                                                                                                                                                                                             | % difference | MDRR    | % difference | MDRR     | % difference | MDRR     | % difference | MDRR    | % difference | MDRR    | % difference | MDRR    | % difference | MDRR    | % difference | MDRR    | % difference |
| Start                                                                                              | End | Vaccine against Hepatitis A | Vaccine against HPV | Minimum detectable relative risk from permutation test |                                                                                                                                                                                                                                                                  |              |         |              |          |              |          |              |         |              |         |              |         |              |         |              |         |              |
| 0                                                                                                  | 14  | 75                          | 98                  | 2.6                                                    | 4.78                                                                                                                                                                                                                                                             | -84%         | ∞       | -∞           | ∞        | -∞           | ∞        | -∞           | 1.94    | 25%          | 2.12    | 18%          | 2.32    | 11%          | 2.44    | 6%           | 2.62    | -1%          |
| 0                                                                                                  | 29  | 140                         | 162                 | 2.12                                                   | 2.98                                                                                                                                                                                                                                                             | -41%         | ∞       | -∞           | ∞        | -∞           | ∞        | -∞           | 1.96    | 8%           | 1.68    | 21%          | 1.8     | 15%          | 1.88    | 11%          | 1.98    | 7%           |
| 0                                                                                                  | 44  | 188                         | 228                 | 1.86                                                   | 2.42                                                                                                                                                                                                                                                             | -30%         | ∞       | -∞           | ∞        | -∞           | ∞        | -∞           | 1.98    | -6%          | 1.68    | 10%          | 1.58    | 15%          | 1.62    | 13%          | 1.7     | 9%           |
| 0                                                                                                  | 59  | 253                         | 291                 | 1.76                                                   | 2.1                                                                                                                                                                                                                                                              | -19%         | ∞       | -∞           | ∞        | -∞           | ∞        | -∞           | 1.98    | -13%         | 1.68    | 5%           | 1.58    | 10%          | 1.5     | 15%          | 1.56    | 11%          |
| 0                                                                                                  | 89  | 396                         | 409                 | 1.6                                                    | 1.8                                                                                                                                                                                                                                                              | -13%         | ∞       | -∞           | ∞        | -∞           | ∞        | -∞           | 2       | -25%         | 1.7     | -6%          | 1.58    | 1%           | 1.5     | 6%           | 1.4     | 13%          |
| 0                                                                                                  | 119 | 524                         | 525                 | 1.52                                                   | 1.62                                                                                                                                                                                                                                                             | -7%          | 3.7     | <-100%       | ∞        | -∞           | ∞        | -∞           | 2.04    | -34%         | 1.7     | -12%         | 1.58    | -4%          | 1.5     | 1%           | 1.4     | 8%           |
| 0                                                                                                  | 359 | 1228                        | 1145                | 1.32                                                   | 1.28                                                                                                                                                                                                                                                             | 3%           | 1.38    | -5%          | 1.44     | -9%          | 1.6      | -21%         | 2.18    | -65%         | 1.78    | -35%         | 1.62    | -23%         | 1.52    | -15%         | 1.42    | -8%          |
| 15                                                                                                 | 29  | 65                          | 64                  | 2.98                                                   | 6.76                                                                                                                                                                                                                                                             | <-100%       | ∞       | -∞           | ∞        | -∞           | ∞        | -∞           | ∞       | -∞           | 2.7     | 9%           | 3.02    | -1%          | 3.2     | -7%          | 3.48    | -17%         |
| 30                                                                                                 | 44  | 48                          | 66                  | 2.92                                                   | 6.6                                                                                                                                                                                                                                                              | <-100%       | ∞       | -∞           | ∞        | -∞           | ∞        | -∞           | ∞       | -∞           | ∞       | -∞           | 2.94    | -1%          | 3.14    | -8%          | 3.4     | -16%         |
| 30                                                                                                 | 59  | 113                         | 129                 | 2.22                                                   | 3.48                                                                                                                                                                                                                                                             | -57%         | ∞       | -∞           | ∞        | -∞           | ∞        | -∞           | ∞       | -∞           | ∞       | -∞           | 3       | -35%         | 2.1     | 5%           | 2.24    | -1%          |
| 30                                                                                                 | 89  | 256                         | 247                 | 1.8                                                    | 2.3                                                                                                                                                                                                                                                              | -28%         | ∞       | -∞           | ∞        | -∞           | ∞        | -∞           | ∞       | -∞           | ∞       | -∞           | 3.08    | -71%         | 2.12    | -18%         | 1.64    | 9%           |
| 60                                                                                                 | 74  | 76                          | 61                  | 2.9                                                    | 7.06                                                                                                                                                                                                                                                             | <-100%       | ∞       | -∞           | ∞        | -∞           | ∞        | -∞           | ∞       | -∞           | ∞       | -∞           | ∞       | -∞           | ∞       | -∞           | 3.6     | -24%         |
| 60                                                                                                 | 89  | 143                         | 118                 | 2.28                                                   | 3.84                                                                                                                                                                                                                                                             | -68%         | ∞       | -∞           | ∞        | -∞           | ∞        | -∞           | ∞       | -∞           | ∞       | -∞           | ∞       | -∞           | ∞       | -∞           | 2.34    | -3%          |
| 90                                                                                                 | ∞   | 1331                        | 1274                | 1.32                                                   | 1.26                                                                                                                                                                                                                                                             | 5%           | 1.22    | 8%           | 1.24     | 6%           | 1.26     | 5%           | ∞       | -∞           | ∞       | -∞           | ∞       | -∞           | ∞       | -∞           | ∞       | -∞           |
| 120                                                                                                | ∞   | 1203                        | 1158                | 1.34                                                   | 1.28                                                                                                                                                                                                                                                             | 4%           | 1.24    | 7%           | 1.24     | 7%           | 1.26     | 6%           | ∞       | -∞           | ∞       | -∞           | ∞       | -∞           | ∞       | -∞           | ∞       | -∞           |
| 180                                                                                                | ∞   | 993                         | 968                 | 1.38                                                   | 1.34                                                                                                                                                                                                                                                             | 3%           | 1.28    | 7%           | 1.28     | 7%           | 1.26     | 9%           | ∞       | -∞           | ∞       | -∞           | ∞       | -∞           | ∞       | -∞           | ∞       | -∞           |
| ∞                                                                                                  | ∞   | 1814                        | 1786                | 1.28                                                   | 1.18                                                                                                                                                                                                                                                             | 8%           | 1.22    | 5%           | 1.24     | 3%           | 1.26     | 2%           | 2.38    | -86%         | 1.84    | -44%         | 1.68    | -31%         | 1.56    | -22%         | 1.44    | -13%         |
| 0                                                                                                  | 14  | 75                          | 98                  | 2.6                                                    | 2.8                                                                                                                                                                                                                                                              | -8%          | 3.58    | -38%         | ∞        | -∞           | ∞        | -∞           | ∞       | -∞           | ∞       | -∞           | ∞       | -∞           | ∞       | -∞           | ∞       | -∞           |
| 0                                                                                                  | 29  | 140                         | 162                 | 2.12                                                   | 2.1                                                                                                                                                                                                                                                              | 1%           | 2.56    | -21%         | 2.1      | 1%           | ∞        | -∞           | ∞       | -∞           | ∞       | -∞           | ∞       | -∞           | ∞       | -∞           | ∞       | -∞           |
| 0                                                                                                  | 44  | 188                         | 228                 | 1.86                                                   | 1.78                                                                                                                                                                                                                                                             | 4%           | 2.12    | -14%         | 2.12     | -14%         | 2.28     | -23%         | 2.56    | -38%         | 2.96    | -59%         | ∞       | -∞           | ∞       | -∞           | ∞       | -∞           |
| 0                                                                                                  | 59  | 253                         | 291                 | 1.76                                                   | 1.62                                                                                                                                                                                                                                                             | 8%           | 1.88    | -7%          | 2.14     | -22%         | 2.3      | -31%         | 1.78    | -1%          | 1.98    | -13%         | ∞       | -∞           | ∞       | -∞           | ∞       | -∞           |
| 0                                                                                                  | 89  | 396                         | 409                 | 1.6                                                    | 1.44                                                                                                                                                                                                                                                             | 10%          | 1.62    | -1%          | 2.18     | -36%         | 2.36     | -48%         | 1.8     | -13%         | 1.52    | 5%           | 2.1     | -31%         | 1.74    | -9%          | ∞       | -∞           |
| 0                                                                                                  | 119 | 524                         | 525                 | 1.52                                                   | 1.34                                                                                                                                                                                                                                                             | 12%          | 1.48    | 3%           | 2.2      | -45%         | 2.4      | -58%         | 1.82    | -20%         | 1.52    | 0%           | 2.14    | -41%         | 1.76    | -16%         | ∞       | -∞           |
| 0                                                                                                  | 359 | 1228                        | 1145                | 1.32                                                   | 1.36                                                                                                                                                                                                                                                             | -3%          | 1.22    | 8%           | 2.4      | -82%         | 2.72     | <-100%       | 1.9     | -44%         | 1.54    | -17%         | 2.3     | -74%         | 1.82    | -38%         | ∞       | -∞           |
| 15                                                                                                 | 29  | 65                          | 64                  | 2.98                                                   | 3.76                                                                                                                                                                                                                                                             | -26%         | 5.54    | -86%         | 2.08     | 30%          | ∞        | -∞           | ∞       | -∞           | ∞       | -∞           | ∞       | -∞           | ∞       | -∞           | ∞       | -∞           |
| 30                                                                                                 | 44  | 48                          | 66                  | 2.92                                                   | 3.68                                                                                                                                                                                                                                                             | -26%         | 5.4     | -85%         | ∞        | -∞           | 2.24     | 23%          | 2.48    | 15%          | 2.86    | 2%           | ∞       | -∞           | ∞       | -∞           | ∞       | -∞           |
| 30                                                                                                 | 59  | 113                         | 129                 | 2.22                                                   | 2.38                                                                                                                                                                                                                                                             | -7%          | 2.96    | -33%         | ∞        | -∞           | 2.26     | -2%          | 1.76    | 21%          | 1.96    | 12%          | ∞       | -∞           | ∞       | -∞           | ∞       | -∞           |
| 30                                                                                                 | 89  | 256                         | 247                 | 1.8                                                    | 1.72                                                                                                                                                                                                                                                             | 4%           | 2.02    | -12%         | ∞        | -∞           | 2.3      | -28%         | 1.78    | 1%           | 1.5     | 17%          | 2.06    | -14%         | 1.72    | 4%           | ∞       | -∞           |
| 60                                                                                                 | 74  | 76                          | 61                  | 2.9                                                    | 3.9                                                                                                                                                                                                                                                              | -34%         | 5.78    | -99%         | ∞        | -∞           | ∞        | -∞           | ∞       | -∞           | 3.02    | -4%          | 2.02    | 30%          | 2.38    | 18%          | ∞       | -∞           |
| 60                                                                                                 | 89  | 143                         | 118                 | 2.28                                                   | 2.5                                                                                                                                                                                                                                                              | -10%         | 3.14    | -38%         | ∞        | -∞           | ∞        | -∞           | ∞       | -∞           | 2.04    | 11%          | 2.04    | 11%          | 1.72    | 25%          | ∞       | -∞           |
| 90                                                                                                 | ∞   | 1331                        | 1274                | 1.32                                                   | 3.08                                                                                                                                                                                                                                                             | <-100%       | 1.36    | -3%          | ∞        | -∞           | ∞        | -∞           | ∞       | -∞           | ∞       | -∞           | ∞       | -∞           | ∞       | -∞           | ∞       | -∞           |
| 120                                                                                                | ∞   | 1203                        | 1158                | 1.34                                                   | ∞                                                                                                                                                                                                                                                                | -∞           | 1.44    | -7%          | ∞        | -∞           | ∞        | -∞           | ∞       | -∞           | ∞       | -∞           | ∞       | -∞           | ∞       | -∞           | ∞       | -∞           |
| 180                                                                                                | ∞   | 993                         | 968                 | 1.38                                                   | ∞                                                                                                                                                                                                                                                                | -∞           | 1.62    | -17%         | ∞        | -∞           | ∞        | -∞           | ∞       | -∞           | ∞       | -∞           | ∞       | -∞           | ∞       | -∞           | ∞       | -∞           |
| ∞                                                                                                  | ∞   | 1814                        | 1786                | 1.28                                                   | 1.38                                                                                                                                                                                                                                                             | -8%          | 1.24    | 3%           | 2.68     | <-100%       | 3.2      | <-100%       | 2       | -56%         | 1.58    | -23%         | 2.52    | -97%         | 1.9     | -48%         | ∞       | -∞           |

-∞: The minimum detectable risk from the standard test is ∞ and the minimum detectable risk from the permutation test is finite.
